# Supplementary material for: Increased academic stress is associated with decreased plasma BDNF in Chilean college students
Source: PeerJ journal article supplement (doi:10.7717/peerj.16357), 2023-11-03
Supplement: CODEBOOK.pdf [file CODEBOOK.pdf]

| Variable | Descripción                               |
|----------|-------------------------------------------|
| .ID      | ID participantes                          |
| -.9      | Valores perdidos                          |
| .Sexo    | Sexo: 0=F;1=M                             |
|          | <b>Beck-II</b>                            |
| BB.FeNac | Fecha nacimiento                          |
| BB.FeEv  | Fecha Evaluación Beck-II basal            |
| BB.Edad  | Edad evaluación Beck-II basal             |
| BB.Car   | Carrera evaluación Beck-II basal          |
| BB.Sem   | Semestre evaluación Beck-II basal         |
| BB.1     | Item 1: Tristeza                          |
| BB.2     | Item 2: Pesimismo                         |
| BB.3     | Item 3: Sentimientos de Fracaso           |
| BB.4     | Item 4: Pérdida de placer                 |
| BB.5     | Item 5: Sentimientos de culpa             |
| BB.6     | Item 6: Sentimientos de castigo           |
| BB.7     | Item 7: Insatisfacción con uno mismo      |
| BB.8     | Item 8: Auto-críticas                     |
| BB.9     | Item 9: Pensamientos o deseos de suicidio |
| BB.10    | Item 10: Llanto                           |
| BB.11    | Item 11: Agitación                        |
| BB.12    | Item 12: Pérdida de interés               |
| BB.13    | Item 13: Indecisión                       |
| BB.14    | Item 14: Inutilidad                       |
| BB.15    | Item 15: Pérdida de Energía               |
| BB.16    | Item 16: Cambio Patrón Sueño              |
| BB.17    | Item 17: Irritabilidad                    |
| BB.18    | Item 18: Cambio en el apetito             |
| BB.19    | Item 19: Dificultad de Concentración      |
| BB.20    | Item 20: Cansancio o fatiga               |
| BB.21    | Item 21: Pérdida de interés por el sexo   |
| BB.PT    | Puntaje total Beck-II basal               |

| <b>Variable</b> | <b>Descripción</b>                               |
|-----------------|--------------------------------------------------|
| <b>FB.FeNac</b> | <b>Fecha nacimiento</b>                          |
| <b>FB.FeEv</b>  | <b>Fecha Evaluación Beck-II final</b>            |
| <b>FB.Edad</b>  | <b>Edad evaluación Beck-II final</b>             |
| <b>FB.Car</b>   | <b>Carrera evaluación Beck-II final</b>          |
| <b>FB.Sem</b>   | <b>Semestre evaluación Beck-II final</b>         |
| <b>FB.1</b>     | <b>Item 1: Tristeza</b>                          |
| <b>FB.2</b>     | <b>Item 2: Pesimismo</b>                         |
| <b>FB.3</b>     | <b>Item 3: Sentimientos de Fracaso</b>           |
| <b>FB.4</b>     | <b>Item 4: Pérdida de placer</b>                 |
| <b>FB.5</b>     | <b>Item 5: Sentimientos de culpa</b>             |
| <b>FB.6</b>     | <b>Item 6: Sentimientos de castigo</b>           |
| <b>FB.97</b>    | <b>Item 7: Insatisfacción con uno mismo</b>      |
| <b>FB.8</b>     | <b>Item 8: Auto-críticas</b>                     |
| <b>FB.9</b>     | <b>Item 9: Pensamientos o deseos de suicidio</b> |
| <b>FB.10</b>    | <b>Item 10: Llanto</b>                           |
| <b>FB.11</b>    | <b>Item 11: Agitación</b>                        |
| <b>FB.12</b>    | <b>Item 12: Pérdida de interés</b>               |
| <b>FB.13</b>    | <b>Item 13: Indecisión</b>                       |
| <b>FB.14</b>    | <b>Item 14: Inutilidad</b>                       |
| <b>FB.15</b>    | <b>Item 15: Pérdida de Energía</b>               |
| <b>FB.16</b>    | <b>Item 16: Cambio Patrón Sueño</b>              |
| <b>FB.17</b>    | <b>Item 17: Irritabilidad</b>                    |
| <b>FB.18</b>    | <b>Item 18: Cambio en el apetito</b>             |
| <b>FB.19</b>    | <b>Item 19: Dificultad de Concentración</b>      |
| <b>FB.20</b>    | <b>Item 20: Cansancio o fatiga</b>               |
| <b>FB.21</b>    | <b>Item 21: Pérdida de interés por el sexo</b>   |
| <b>FB.PT</b>    | <b>Puntaje total Beck-II final</b>               |
|                 | <b>ISCO-II academic stress inventory</b>         |

| Variable   | Descripción                                                                                                              |
|------------|--------------------------------------------------------------------------------------------------------------------------|
| BS.FeNac   | Fecha nacimiento                                                                                                         |
| BS.FeEv    | Fecha Evaluación SISCO-II basal                                                                                          |
| BS.Edad    | Edad evaluación SISCO-II basal                                                                                           |
| BS.Car     | Carrera evaluación SISCO-II basal                                                                                        |
| BS.Sem     | Semestre evaluación SISCO-II basal                                                                                       |
| BS.P1      | 1: Sí 0: No                                                                                                              |
| BS.P2      | Número                                                                                                                   |
| BS.P3_1    | Sobrecarga de tareas y trabajos académicos                                                                               |
| BS.P3_2    | La personalidad y carácter de los profesores                                                                             |
| BS.P3_3    | Las evaluaciones de los profesores (exámenes, ensayos, trabajos de investigación, etc.)                                  |
| BS.P3_4    | El tipo de trabajo que te piden los profesores (consulta de mapas, fichas de trabajo, ensayos, mapas conceptuales, etc.) |
| BS.P3_5    | No entender los temas que se abordan en la clase                                                                         |
| BS.P3_6    | Participación en clase (responder a preguntas, exposiciones, etc.)                                                       |
| BS.P3_7    | Tiempo limitado para hacer el trabajo                                                                                    |
| BS.P3_8    | Los compañeros de grupo progresan más rápido en tareas y/o trabajos académicos                                           |
| BS.P4_1    | Trastornos del sueño (insomnio o pesadillas)                                                                             |
| BS.P4_2    | Fatiga crónica (cansancio permanente)                                                                                    |
| BS.P4_3    | Dolores de cabeza o migrañas                                                                                             |
| BS.P4_4    | Problemas de digestión, dolor abdominal o diarrea                                                                        |
| BS.P4_5    | Rascarse, morderse las uñas, frotarse, etc.                                                                              |
| BS.P4_6    | Somnolencia o mayor necesidad de dormir.                                                                                 |
| BS.P4_7    | Dolores musculares y/o contracturas                                                                                      |
| BS.P4_8    | Reacciones cutáneas (sarpullido, descamación, etc.)                                                                      |
| BS.P4_9    | Inquietud (incapacidad de relajarse y estar tranquilo)                                                                   |
| BS.P4_10   | Ansiedad, angustia o desesperación                                                                                       |
| BS.P4_11   | Aumento o reducción del consumo de alimentos                                                                             |
| BS.P4_12   | Sentimientos de depresión y tristeza (decaído)                                                                           |
| BS.P4_13   | Sentimiento de agresividad o aumento de irritabilidad                                                                    |
| BS.P4_14   | Cambios bruscos de humor                                                                                                 |
| BS.P4_15   | Conflictos o tendencia a polemizar o discutir                                                                            |
| BS.P4_16   | Aislamiento de los demás                                                                                                 |
| BS.P4_17   | Desgano para realizar tus labores de estudiante                                                                          |
| BS.P5_1    | Elaboración de un plan de ejecución de sus tareas                                                                        |
| BS.P5_2    | Elogios a sí mismo                                                                                                       |
| BS.P5_3    | Ventilación y confidencias (verbalización de la situación que preocupa)                                                  |
| BS.P5_4    | Intenté sacar algo positivo o beneficioso de la situación estresante                                                     |
| BS.P5_5    | Practicar un pasatiempo (actividad física, leer, ver series, redes sociales, etc.)                                       |
| BS.P5_6    | Acompañarse de un ser querido (familia, mascotas, amigos, etc.)                                                          |
| BS.EstSIS  | Total Estresores SISCO-II evaluación basal                                                                               |
| BS.RfsSIS  | Total Reacciones físicas y psicológicas SISCO-II evaluación basal                                                        |
| BS.RcsSIS  | Total reacciones del comportamiento social SISCO-II evaluación basal                                                     |
| BS.RxTSIS  | Total Reacción Total SISCO-II evaluación basal                                                                           |
| BS.EASIS   | Total medida de estrés académico SISCO-II evaluación basal                                                               |
| BS.AfSIS   | Total Afrontamiento SISCO-II (Factor 4) evaluación basal                                                                 |
| BS.TSIS.Af | Total SISCO-II + afrontamiento evaluación basal                                                                          |

| Variable    | Descripción                                                                                                              |
|-------------|--------------------------------------------------------------------------------------------------------------------------|
| FS.FeNac    | Fecha nacimiento                                                                                                         |
| FS.FeEv     | Fecha Evaluación SISCO-II final                                                                                          |
| FS.Edad     | Edad evaluación SISCO-II final                                                                                           |
| FS.Car      | Carrera evaluación SISCO-II final                                                                                        |
| FS.Sem      | Semestre evaluación SISCO-II final                                                                                       |
| FS.P1       | 1:Sí 0:No                                                                                                                |
| FS.P2       | Número                                                                                                                   |
| FS.P3_1     | Sobrecarga de tareas y trabajos académicos                                                                               |
| FS.P3_2     | La personalidad y carácter de los profesores                                                                             |
| FS.P3_3     | Las evaluaciones de los profesores (exámenes, ensayos, trabajos de investigación, etc.)                                  |
| FS.P3_4     | El tipo de trabajo que te piden los profesores (consulta de mapas, fichas de trabajo, ensayos, mapas conceptuales, etc.) |
| FS.P3_5     | No entender los temas que se abordan en la clase                                                                         |
| FS.P3_6     | Participación en clase (responder a preguntas, exposiciones, etc.)                                                       |
| FS.P3_7     | Tiempo limitado para hacer el trabajo                                                                                    |
| FS.P3_8     | Los compañeros de grupo progresan más rápido en tareas y/o trabajos académicos                                           |
| FS.P4_1     | Trastornos del sueño (insomnio o pesadillas)                                                                             |
| FS.P4_2     | Fatiga crónica (cansancio permanente)                                                                                    |
| FS.P4_3     | Dolores de cabeza o migrañas                                                                                             |
| FS.P4_4     | Problemas de digestión, dolor abdominal o diarrea                                                                        |
| FS.P4_5     | Rascarse, morderse las uñas, frotarse, etc.                                                                              |
| FS.P4_6     | Somnolencia o mayor necesidad de dormir.                                                                                 |
| FS.P4_7     | Dolores musculares y/o contracturas                                                                                      |
| FS.P4_8     | Reacciones cutáneas (sarpullido, descamación, etc.)                                                                      |
| FS.P4_9     | Inquietud (incapacidad de relajarse y estar tranquilo)                                                                   |
| FS.P4_10    | Ansiedad, angustia o desesperación                                                                                       |
| FS.P4_11    | Aumento o reducción del consumo de alimentos                                                                             |
| FS.P4_12    | Sentimientos de depresión y tristeza (decaído)                                                                           |
| FS.P4_13    | Sentimiento de agresividad o aumento de irritabilidad                                                                    |
| FS.P4_14    | Cambios bruscos de humor                                                                                                 |
| FS.P4_15    | Conflictos o tendencia a polemizar o discutir                                                                            |
| FS.P4_16    | Aislamiento de los demás                                                                                                 |
| FS.P4_17    | Desgano para realizar tus labores de estudiante                                                                          |
| FS.P5_1     | Elaboración de un plan de ejecución de sus tareas                                                                        |
| FS.P5_2     | Elogios a sí mismo                                                                                                       |
| FS.P5_3     | Ventilación y confidencias (verbalización de la situación que preocupa)                                                  |
| FS.P5_4     | Intenté sacar algo positivo o beneficioso de la situación estresante                                                     |
| FS.P5_5     | Practicar un pasatiempo (actividad física, leer, ver series, redes sociales, etc.)                                       |
| FS.P5_6     | Acompañarse de un ser querido (familia, mascotas, amigos, etc.)                                                          |
| FS.EstSIS   | Total Estresores SISCO-II evaluación final                                                                               |
| FS.RfsSIS.2 | Total Reacciones físicas y psicológicas SISCO-II evaluación final                                                        |
| FS.RcsSIS   | Total reacciones del comportamiento social SISCO-II evaluación final                                                     |
| FS.RxTSIS   | Total Reacción Total SISCO-II evaluación final                                                                           |
| FS.EASIS    | Total medida de estrés académico SISCO-II evaluación final                                                               |
| FS.AfSIS    | Total Afrontamiento SISCO-II (Factor 4) evaluación basal                                                                 |
| FS.TSIS.Af  | Total SISCO-II + afrontamiento evaluación final                                                                          |

| Variable | Descripción |
|----------|-------------|
|          | Basic data  |

| Variable                                                     | Descripción                            |
|--------------------------------------------------------------|----------------------------------------|
| BDG.FeNac                                                    | Fecha Nacimiento                       |
| BDG.FeEv                                                     | Fecha Evaluación datos generales basal |
| BDG.Edad                                                     | Edad evaluación datos generales basal  |
| BDG.Car                                                      | Carrera datos generales basal          |
| BDG.Sem                                                      | Semestre datos generales basal         |
| BDG.TTOPsq                                                   | T. psiquiátrico datos generales basal  |
| BDG.TTOPsic                                                  | Tto psicológico datos generales basal  |
| BDG.TTOfar                                                   | Tto fármaco datos generales basal      |
| BDG.TTOfarNom                                                | Si: Cuál(es)                           |
| BDG.Fuma                                                     | Fuma datos generales basal             |
| BDG.FumaNro                                                  | Si: N°                                 |
| BDG.Bebe                                                     | Bebe datos generales basal             |
| BDG.BebeNro                                                  | Si: N°                                 |
| BDG.AcFis                                                    | Ac. Física datos generales basal       |
| BDG.AcFisNro                                                 | Si: N°                                 |
| BDG.AcFisCual                                                | Si:                                    |
| FDG.FeNac                                                    | Fecha Nacimiento                       |
| FDG.FeEv                                                     | Fecha Evaluación datos generales final |
| FDG.Edad                                                     | Edad evaluación datos generales final  |
| FDG.Car                                                      | Carrera datos generales final          |
| FDG.Sem                                                      | Semestre datos generales final         |
| FDG.TTOPsq                                                   | T. psiquiátrico datos generales final  |
| FDG.TTOPsic                                                  | Tto psicológico datos generales final  |
| FDG.TTOfar                                                   | Tto fármaco datos generales final      |
| FDG.TTOfarNom                                                | Si: Cuál(es)                           |
| FDG.Fuma                                                     | Fuma datos generales final             |
| FDG.FumaNro                                                  | Si: N°                                 |
| FDG.Bebe                                                     | Bebe datos generales final             |
| FDG.BebeNro                                                  | Si: N°                                 |
| FDG.AcFis                                                    | Ac. Física datos generales final       |
| FDG.AcFisNro                                                 | Si: N°                                 |
| FDG.AcFisCual                                                | Si:                                    |
| AUDIT questionnaire for the detection of alcohol consumption |                                        |

| Variable    | Descripción                                                                                                                                       |
|-------------|---------------------------------------------------------------------------------------------------------------------------------------------------|
| FETOH.FeNac | Fecha Nacimiento                                                                                                                                  |
| FETOH.FeEv  | Fecha Evaluación ETOH final                                                                                                                       |
| FETOH.Edad  | Edad Evaluación ETOH final                                                                                                                        |
| FETOH.Car   | Carrera Evaluación ETOH final                                                                                                                     |
| FETOH.Sem   | Semestre Evaluación ETOH final                                                                                                                    |
| FETOH.A1    | (1) ¿Con qué frecuencia consume alguna bebida alcohólica?:                                                                                        |
| FETOH.A2    | (2) ¿Cuántos TRAGOS de alcohol suele tomar en un día de consumo normal?:                                                                          |
| FETOH.A3    | (3) ¿Con que frecuencia toma 5 o más TRAGOS en un solo día?:                                                                                      |
| FETOH.A4    | (4) En el curso del último año, ¿Con qué frecuencia ha sido incapaz de parar de beber una vez que había empezado?                                 |
| FETOH.A5    | (5) En el curso del último año, ¿Con qué frecuencia no pudo hacer lo que se esperaba de usted porque había bebido?                                |
| FETOH.A6    | (6) En el curso del último año, ¿Con qué frecuencia ha necesitado beber en ayunas para recuperarse después de haber bebido mucho el día anterior? |
| FETOH.A7    | (7) En el curso del último año, ¿Con qué frecuencia ha tenido remordimientos o sentimientos de culpa después de haber bebido?                     |
| FETOH.A8    | (8) En el curso del último año, ¿Con qué frecuencia no ha podido recordar lo que sucedió la noche anterior porque había estado bebiendo?          |

| Variable  | Descripción                                                                                                                                                       |
|-----------|-------------------------------------------------------------------------------------------------------------------------------------------------------------------|
| FETOH.A9  | (9) ¿Usted o alguna otra persona ha resultado herido porque usted había bebido?                                                                                   |
| FETOH.A10 | (10) ¿Algún familiar, amigo, médico o profesional de la salud ha mostrado preocupación por su consumo de bebidas alcohólicas o le han sugerido que deje de beber? |
| FETOH.PT  | Puntaje total ETOH                                                                                                                                                |
|           | SRQ Self Reporting Questionnaire                                                                                                                                  |



| Variable   | Descripción                                                                                                |
|------------|------------------------------------------------------------------------------------------------------------|
| FSRQ.FeNac | Fecha Nacimiento                                                                                           |
| FSRQ.FeEv  | Fecha Evaluación SRQ final                                                                                 |
| FSRQ.Edad  | Edad Evaluación SRQ final                                                                                  |
| FSRQ.Car   | Carrera Evaluación SRQ final                                                                               |
| FSRQ.Sem   | Semestre Evaluación SRQ final                                                                              |
| FSRQ.1     | 1. <input type="checkbox"/> Tiene frecuentes dolores de cabeza?                                            |
| FSRQ.2     | 2. <input type="checkbox"/> Tiene mal apetito?                                                             |
| FSRQ.3     | 3. <input type="checkbox"/> Duerme mal?                                                                    |
| FSRQ.4     | 4. <input type="checkbox"/> Se asusta con facilidad?                                                       |
| FSRQ.5     | 5. <input type="checkbox"/> Sufre de temblor de manos?                                                     |
| FSRQ.6     | 6. <input type="checkbox"/> Se siente nervioso, tenso o aburrido?                                          |
| FSRQ.7     | 7. <input type="checkbox"/> Sufre de mala digestión?                                                       |
| FSRQ.8     | 8. <input type="checkbox"/> Le cuesta pensar con claridad?                                                 |
| FSRQ.9     | 9. <input type="checkbox"/> Se siente triste?                                                              |
| FSRQ.10    | 10. <input type="checkbox"/> Lloro con mucha frecuencia?                                                   |
| FSRQ.11    | 11. <input type="checkbox"/> Tiene dificultad para disfrutar sus actividades diarias?                      |
| FSRQ.12    | 12. <input type="checkbox"/> Tiene dificultad para tomar decisiones?                                       |
| FSRQ.13    | 13. <input type="checkbox"/> Tiene dificultad para hacer su trabajo diario? (¿sufre usted con su trabajo?) |
| FSRQ.14    | 14. <input type="checkbox"/> Es incapaz de desempeñar un papel útil en su vida?                            |
| FSRQ.15    | 15. <input type="checkbox"/> Ha perdido interés en las cosas?                                              |
| FSRQ.16    | 16. <input type="checkbox"/> Siente que usted es una persona inútil?                                       |
| FSRQ.17    | 17. <input type="checkbox"/> Ha tenido la idea de acabar con su vida?                                      |
| FSRQ.18    | 18. <input type="checkbox"/> Se siente cansado todo el tiempo?                                             |
| FSRQ.19    | 19. <input type="checkbox"/> Tiene sensaciones desagradables en su estómago?                               |
| FSRQ.20    | 20. <input type="checkbox"/> Se cansa con facilidad?                                                       |
| FSRQ.PT    | Puntaje total SRQ                                                                                          |
|            | Laboratory evaluations                                                                                     |

| Variable    | Descripción                    |
|-------------|--------------------------------|
| BLAB.FeNac  | Fecha Nacimiento               |
| BLAB.FeEv   | Fecha Evaluación basal         |
| BLAB.Edad   | Edad Evaluación basal          |
| BLAB.Car    | Carrera Evaluación basal       |
| BLAB.Sem    | Semestre Evaluación basal      |
| BLAB.BDNF1  | [BDNF] ng/ml basal             |
| BLAB.BDNF2  | [BDNF] ng/ml basal             |
| BLAB.BDNF   | [BDNF] ng/ml basal             |
| BLAB.Met1   | % Metilación basal             |
| BLAB.Met2   | % Metilación basal             |
| BLAB.Met    | % Metilación basal             |
| FLAB.FeNac  | Fecha Nacimiento               |
| FLAB.FeEv   | Fecha Evaluación final         |
| FLAB.Edad   | Edad Evaluación final          |
| FLAB.Car    | Carrera Evaluación final       |
| FLAB.Sem    | Semestre Evaluación final      |
| FLAB.BDNF1  | [BDNF] ng/ml final             |
| FLAB.BDNF2  | [BDNF] ng/ml final             |
| FLAB.BDNF   | [BDNF] ng/ml final             |
| FLAB.Met1   | % Metilación final             |
| FLAB.Met2   | % Metilación final             |
| FLAB.Met    | % Metilación final             |
| BDNF.log.BF | log [BDNF] Basal/Final         |
| MET.log.BF  | log % Metilación Basal/Final   |
| BDNF.RatBF  | Ratio [BDNF] Basal/Final       |
| MET.RatBF   | Ratio % Metilación Basal/Final |
| SNP.BDNF    | SNP BDNF                       |

|                                             |
|---------------------------------------------|
| <b>Description</b>                          |
| <b>Participant ID</b>                       |
| <b>Missing values</b>                       |
| <b>Sex: 0=F;1=M</b>                         |
|                                             |
| <b>Date of birth</b>                        |
| <b>Date of baseline Beck-II assessment</b>  |
| <b>Age baseline Beck-II assessment</b>      |
| <b>Career Beck-II baseline assessment</b>   |
| <b>Semester baseline Beck-II assessment</b> |
| <b>Item 1: Sadness</b>                      |
| <b>Item 2: Pessimism</b>                    |
| <b>Item 3: Feelings of failure</b>          |
| <b>Item 4: Loss of pleasure</b>             |
| <b>Item 5: Feelings of guilt</b>            |
| <b>Item 6: Feelings of Punishment</b>       |
| <b>Item 7: Dissatisfaction with oneself</b> |
| <b>Item 8: Self-criticism</b>               |
| <b>Item 9: Suicidal thoughts or desires</b> |
| <b>Item 10: Crying</b>                      |
| <b>Item 11: Agitation</b>                   |
| <b>Item 12: Loss of interest</b>            |
| <b>Item 13: Indecision</b>                  |
| <b>Item 14: Uselessness</b>                 |
| <b>Item 15: Loss of Energy</b>              |
| <b>Item 16: Change of Sleep Pattern</b>     |
| <b>Item 17: Irritability</b>                |
| <b>Item 18: Change in appetite</b>          |
| <b>Item 19: Difficulty in Concentration</b> |
| <b>Item 20: Tiredness or fatigue</b>        |
| <b>Item 21: Loss of interest in sex</b>     |
| <b>Total Beck-II baseline score</b>         |

|                                             |
|---------------------------------------------|
| <b>Description</b>                          |
| <b>Date of birth</b>                        |
| <b>Date of final Beck-II assessment</b>     |
| <b>Age final Beck-II assessment</b>         |
| <b>Career final Beck-II assessment</b>      |
| <b>Semester final Beck-II assessment</b>    |
| <b>Item 1: Sadness</b>                      |
| <b>Item 2: Pessimism</b>                    |
| <b>Item 3: Feelings of failure</b>          |
| <b>Item 4: Loss of pleasure</b>             |
| <b>Item 5: Feelings of guilt</b>            |
| <b>Item 6: Feelings of Punishment</b>       |
| <b>Item 7: Dissatisfaction with oneself</b> |
| <b>Item 8: Self-criticism</b>               |
| <b>Item 9: Suicidal thoughts or desires</b> |
| <b>Item 10: Crying</b>                      |
| <b>Item 11: Agitation</b>                   |
| <b>Item 12: Loss of interest</b>            |
| <b>Item 13: Indecision</b>                  |
| <b>Item 14: Uselessness</b>                 |
| <b>Item 15: Loss of Energy</b>              |
| <b>Item 16: Change of Sleep Pattern</b>     |
| <b>Item 17: Irritability</b>                |
| <b>Item 18: Change in appetite</b>          |
| <b>Item 19: Difficulty Concentrating</b>    |
| <b>Item 20: Tiredness or fatigue</b>        |
| <b>Item 21: Loss of Interest in Sex</b>     |
| <b>Beck-II final total score</b>            |
|                                             |

|                                                                                                     |
|-----------------------------------------------------------------------------------------------------|
| <b>Description</b>                                                                                  |
| Date of birth                                                                                       |
| Date of birth Date of baseline SISCO-II assessment                                                  |
| Age baseline SISCO-II assessment                                                                    |
| Career baseline SISCO-II assessment                                                                 |
| Semester baseline SISCO-II assessment                                                               |
| 1:Yes 0:No                                                                                          |
| Number                                                                                              |
| Overload of homework and academic work                                                              |
| The personality and character of teachers                                                           |
| Teachers' evaluations (exams, essays, research papers, etc.)                                        |
| The type of work teachers ask you to do (map consultation, worksheets, essays, concept maps, etc.). |
| Failure to understand the topics covered in class.                                                  |
| Participation in class (answering questions, presentations, etc.)                                   |
| Limited time to do the work                                                                         |
| Group mates make faster progress on homework and/or academic work.                                  |
| Sleep disturbances (insomnia or nightmares)                                                         |
| Chronic fatigue (permanent tiredness)                                                               |
| Headaches or migraines                                                                              |
| Digestion problems, abdominal pain or diarrhoea                                                     |
| Scratching, nail biting, rubbing, etc.                                                              |
| Drowsiness or increased need for sleep.                                                             |
| Muscle aches and/or contractures                                                                    |
| Skin reactions (rash, peeling, etc.)                                                                |
| Restlessness (inability to relax and be calm)                                                       |
| Anxiety, distress or despair                                                                        |
| Increased or decreased food intake                                                                  |
| Feelings of depression and sadness (downhearted)                                                    |
| Feelings of aggression or increased irritability                                                    |
| Sudden mood swings                                                                                  |
| Conflict or tendency to argue or quarrel                                                            |
| Isolation from others                                                                               |
| Unwillingness to do your work as a student                                                          |
| Making a plan for the execution of your tasks                                                       |
| Self-praise                                                                                         |
| Venting and confiding (verbalising the situation of concern)                                        |
| I tried to get something positive or beneficial out of the stressful situation.                     |
| taking up a hobby (physical activity, reading, watching series, social networking, etc.)            |
| Accompanying a loved one (family, pets, friends, etc.).                                             |
| Total Stressors SISCO-II baseline assessment                                                        |
| Total Physical and Psychological Reactions SISCO-II baseline assessment                             |
| Total social behavioural reactions SISCO-II baseline assessment                                     |
| Total Total Reaction Total SISCO-II baseline assessment                                             |
| Total Academic Stress Measurement SISCO-II baseline assessment                                      |
| Total Coping SISCO-II (Factor 4) baseline assessment                                                |
| Total SISCO-II + coping baseline assessment                                                         |

|                                                                                                     |
|-----------------------------------------------------------------------------------------------------|
| <b>Description</b>                                                                                  |
| Date of birth                                                                                       |
| Date of birth Date of final SISCO-II assessment                                                     |
| Age final SISCO-II assessment                                                                       |
| Career final SISCO-II assessment                                                                    |
| Semester Final SISCO-II assessment                                                                  |
| 1:Yes 0:No                                                                                          |
| Number                                                                                              |
| Overload of homework and academic work                                                              |
| The personality and character of teachers                                                           |
| Teachers' evaluations (exams, essays, research papers, etc.)                                        |
| The type of work teachers ask you to do (map consultation, worksheets, essays, concept maps, etc.). |
| Failure to understand the topics covered in class.                                                  |
| Participation in class (answering questions, presentations, etc.)                                   |
| Limited time to do the work                                                                         |
| Group mates make faster progress on homework and/or academic work.                                  |
| Sleep disturbances (insomnia or nightmares)                                                         |
| Chronic fatigue (permanent tiredness)                                                               |
| Headaches or migraines                                                                              |
| Digestion problems, abdominal pain or diarrhoea                                                     |
| Scratching, nail biting, rubbing, etc.                                                              |
| Drowsiness or increased need for sleep.                                                             |
| Muscle aches and/or contractures                                                                    |
| Skin reactions (rash, peeling, etc.)                                                                |
| Restlessness (inability to relax and be calm)                                                       |
| Anxiety, distress or despair                                                                        |
| Increased or decreased food intake                                                                  |
| Feelings of depression and sadness (downhearted)                                                    |
| Feelings of aggression or increased irritability                                                    |
| Sudden mood swings                                                                                  |
| Conflict or tendency to argue or quarrel                                                            |
| Isolation from others                                                                               |
| Unwillingness to do your work as a student                                                          |
| Making a plan for the execution of your tasks                                                       |
| Self-praise                                                                                         |
| Venting and confiding (verbalising the situation of concern)                                        |
| I tried to get something positive or beneficial out of the stressful situation.                     |
| taking up a hobby (physical activity, reading, watching series, social networking, etc.)            |
| Accompanying a loved one (family, pets, friends, etc.).                                             |
| Total Stressors SISCO-II final assessment                                                           |
| Total physical and psychological reactions SISCO-II final assessment                                |
| Total social behavioural reactions SISCO-II final assessment                                        |
| Total Total Reaction Total SISCO-II final assessment                                                |
| Total Academic Stress Measurement SISCO-II final assessment                                         |
| Total Coping SISCO-II (Factor 4) baseline assessment                                                |
| Total SISCO-II + coping final assessment                                                            |

|                    |
|--------------------|
| <b>Description</b> |
|                    |

|                                                          |
|----------------------------------------------------------|
| <b>Description</b>                                       |
| Date of birth                                            |
| Date Assessment date general baseline data               |
| Age assessment general baseline data                     |
| Career general baseline data                             |
| Semester general baseline data                           |
| Psychiatric treatment general data baseline general data |
| Psychological treatment general data baseline            |
| Drug treatment general data baseline                     |
| Yes: Which one(s)                                        |
| Smoking general data baseline                            |
| If: No.                                                  |
| Drinks general data baseline                             |
| Yes: No                                                  |
| Physical activity general data baseline                  |
| Yes: No                                                  |
| Yes: No                                                  |
| Date of birth                                            |
| Date of evaluation final general data                    |
| Age assessment final general data                        |
| Career final general data                                |
| Semester final general data                              |
| Psychiatric treatment final general data                 |
| Psychological treatment final general data               |
| Drug treatment final general data                        |
| Yes: Which one(s)                                        |
| Smoking final general data                               |
| If: No.                                                  |
| Drinks final general data                                |
| If: No.                                                  |
| Physical activity final general data                     |
| Yes: No                                                  |
| Yes: No                                                  |
|                                                          |



|                                                                                                                                                   |
|---------------------------------------------------------------------------------------------------------------------------------------------------|
| <b>Description</b>                                                                                                                                |
| <b>Date of Birth</b>                                                                                                                              |
| <b>Date of Final ETOH Assessment</b>                                                                                                              |
| <b>Age Final ETOH assessment</b>                                                                                                                  |
| <b>Career Final ETOH assessment</b>                                                                                                               |
| <b>Semester Final ETOH assessment</b>                                                                                                             |
| <br><b>(1) How often do you drink alcoholic beverages?</b><br><br>                                                                                |
| <br><b>(2) How many DRINKS of alcohol do you usually drink in a normal drinking day?</b><br><br>                                                  |
| <br><b>(3) How often do you have 5 or more DRINKS in a single day?</b><br><br>                                                                    |
| <br><b>(4) Over the course of the past year, how often have you been unable to stop drinking once you had started?</b><br><br>                    |
| <br><b>(5) In the past year, how often were you unable to do what was expected of you because you had been drinking?</b><br><br>                  |
| <br><b>(6) In the past year, how often have you needed to drink on an empty stomach to recover from heavy drinking the day before?</b><br><br>    |
| <br><b>(7) In the past year, how often have you had regrets or feelings of guilt after drinking?</b><br><br>                                      |
| <br><b>(8) In the past year, how often have you been unable to remember what happened the night before because you had been drinking?</b><br><br> |

| Description                                                                                                                                   |
|-----------------------------------------------------------------------------------------------------------------------------------------------|
| (9) Have you or anyone else been hurt because you had been drinking?                                                                          |
| (10) Have any family members, friends, doctors or health professionals shown concern about your drinking or suggested that you stop drinking? |
| Total ETOH score                                                                                                                              |
|                                                                                                                                               |

|                                                                                             |
|---------------------------------------------------------------------------------------------|
| <b>Description</b>                                                                          |
| <b>Date of Birth</b>                                                                        |
| <b>Date of Final SRQ Assessment</b>                                                         |
| <b>Age Final SRQ assessment</b>                                                             |
| <b>Career Final SRQ assessment</b>                                                          |
| <b>Semester Final SRQ assessment</b>                                                        |
| <b>1. Do you have frequent headaches?</b>                                                   |
| <b>2. Do you have a poor appetite?</b>                                                      |
| <b>3. Do you sleep badly?</b>                                                               |
| <b>4. Are you easily frightened?</b>                                                        |
| <b>5. Do you suffer from hand trembling?</b>                                                |
| <b>6. Does he feel nervous, tense or bored?</b>                                             |
| <b>7. Do you suffer from poor digestion?</b>                                                |
| <b>8. Do you find it difficult to think clearly?</b>                                        |
| <b>9. Do you feel sad?</b>                                                                  |
| <b>10. Do you cry very often?</b>                                                           |
| <b>11. Do you have difficulty enjoying your daily activities?</b>                           |
| <b>12. Do you have difficulty making decisions?</b>                                         |
| <b>13. Do you have difficulty in doing your daily work (do you suffer with your work?)?</b> |
| <b>14. Are you unable to play a useful role in your life?</b>                               |
| <b>15. Have you lost interest in things?</b>                                                |
| <b>16. Do you feel that you are a useless person?</b>                                       |
| <b>17. Have you ever had the idea of ending your life?</b>                                  |
| <b>18. Do you feel tired all the time?</b>                                                  |
| <b>19. Do you have unpleasant feelings in your stomach?</b>                                 |
| <b>20. Do you get tired easily?</b>                                                         |
| <b>Total SRQ score</b>                                                                      |
|                                                                                             |

|                                           |
|-------------------------------------------|
| <b>Description</b>                        |
| <b>Date of birth</b>                      |
| <b>Date Baseline Assessment</b>           |
| <b>Age Baseline assessment</b>            |
| <b>Career Baseline assessment</b>         |
| <b>Semester Baseline assessment</b>       |
| <b>[BDNF] ng/ml baseline</b>              |
| <b>[BDNF] ng/ml baseline</b>              |
| <b>[BDNF] ng/ml baseline</b>              |
| <b>% Basal methylation</b>                |
| <b>% Basal methylation</b>                |
| <b>% Basal methylation</b>                |
| <b>Date of birth</b>                      |
| <b>Date Final assessment</b>              |
| <b>Age Final assessment</b>               |
| <b>Career Final assessment</b>            |
| <b>Semester Final assessment</b>          |
| <b>[BDNF] ng/ml final</b>                 |
| <b>[BDNF] ng/ml final</b>                 |
| <b>[BDNF] ng/ml final</b>                 |
| <b>Final % Methylation</b>                |
| <b>Final % Methylation</b>                |
| <b>Final % Methylation</b>                |
| <b>log [BDNF] Baseline/Final</b>          |
| <b>log % Methylation Baseline/Final</b>   |
| <b>Ratio [BDNF] Baseline/Final</b>        |
| <b>Ratio % Methylation Baseline/Final</b> |
| <b>BDNF SNP</b>                           |











| Observaciones | Remarks |
|---------------|---------|
|               |         |

| <b>Observaciones</b> | <b>Remarks</b> |
|----------------------|----------------|
| dd/mm/aaaa           | dd/mm/yyyy     |
| dd/mm/aaaa           | dd/mm/yyyy     |
| Años                 | years          |
|                      |                |
|                      |                |
| 1:Sí 0:No            | 1:Yes 0:No     |
| 1:Sí 0:No            | 1:Yes 0:No     |
| 1:Sí 0:No            | 1:Yes 0:No     |
| Nombre               | Name           |
| 1:Sí 0:No            | 1:Yes 0:No     |
| Número               | Number         |
| 1:Sí 0:No            | 1:Yes 0:No     |
| Número               | Number         |
| 1:Sí 0:No            | 1:Yes 0:No     |
| Número               | Number         |
| Cuál                 | Which          |
| dd/mm/aaaa           | dd/mm/yyyy     |
| dd/mm/aaaa           | dd/mm/yyyy     |
| Años                 | years          |
|                      |                |
|                      |                |
| 1:Sí 0:No            | 1:Yes 0:No     |
| 1:Sí 0:No            | 1:Yes 0:No     |
| 1:Sí 0:No            | 1:Yes 0:No     |
| Nombre               | Name           |
| 1:Sí 0:No            | 1:Yes 0:No     |
| Número               | Number         |
| 1:Sí 0:No            | 1:Yes 0:No     |
| Número               | Number         |
| 1:Sí 0:No            | 1:Yes 0:No     |
| Número               | Number         |
| Cuál                 | Which          |
|                      |                |



| Observaciones                                                                                   | Remarks                                                                                                                |
|-------------------------------------------------------------------------------------------------|------------------------------------------------------------------------------------------------------------------------|
| <b>0. No</b><br><b>1. Sí, pero no en el curso del último año</b><br><b>2. Sí, el último año</b> | <b>0. No</b><br><b>1. Yes, but not within the last year"</b><br><b>"2.</b><br><b>2. Yes, within the last year" "0.</b> |
| <b>0. No</b><br><b>1. Sí, pero no en el curso del último año</b><br><b>2. Sí, el último año</b> | <b>0. No</b><br><b>Yes, but not within the last year" "0.</b><br><b>Yes, in the last year" "0.</b>                     |
|                                                                                                 |                                                                                                                        |
|                                                                                                 |                                                                                                                        |

| <b>Observaciones</b>       | <b>Remarks</b>          |
|----------------------------|-------------------------|
| <b>dd/mm/aaaa</b>          | <b>dd/mm/yyyy</b>       |
| <b>dd/mm/aaaa</b>          | <b>dd/mm/yyyy</b>       |
| <b>Edad</b>                | <b>years</b>            |
|                            |                         |
|                            |                         |
| <b>1: Sí 0: No</b>         | <b>1: Yes 0: No</b>     |
| <b>1: Sí 0: No</b>         | <b>1: Yes 0: No</b>     |
| <b>1: Sí 0: No</b>         | <b>1: Yes 0: No</b>     |
| <b>1: Sí 0: No</b>         | <b>1: Yes 0: No</b>     |
| <b>1: Sí 0: No</b>         | <b>1: Yes 0: No</b>     |
| <b>1: Sí 0: No</b>         | <b>1: Yes 0: No</b>     |
| <b>1: Sí 0: No</b>         | <b>1: Yes 0: No</b>     |
| <b>1: Sí 0: No</b>         | <b>1: Yes 0: No</b>     |
| <b>1: Sí 0: No</b>         | <b>1: Yes 0: No</b>     |
| <b>1: Sí 0: No</b>         | <b>1: Yes 0: No</b>     |
| <b>1: Sí 0: No</b>         | <b>1: Yes 0: No</b>     |
| <b>1: Sí 0: No</b>         | <b>1: Yes 0: No</b>     |
| <b>1: Sí 0: No</b>         | <b>1: Yes 0: No</b>     |
| <b>1: Sí 0: No</b>         | <b>1: Yes 0: No</b>     |
| <b>1: Sí 0: No</b>         | <b>1: Yes 0: No</b>     |
| <b>1: Sí 0: No</b>         | <b>1: Yes 0: No</b>     |
| <b>1: Sí 0: No</b>         | <b>1: Yes 0: No</b>     |
| <b>1: Sí 0: No</b>         | <b>1: Yes 0: No</b>     |
| <b>1: Sí 0: No</b>         | <b>1: Yes 0: No</b>     |
| <b>1: Sí 0: No</b>         | <b>1: Yes 0: No</b>     |
| <b>1: Sí 0: No</b>         | <b>1: Yes 0: No</b>     |
| <b>1: Sí 0: No</b>         | <b>1: Yes 0: No</b>     |
| <b>Puntaje de corte:11</b> | <b>Cut-off score:11</b> |
|                            |                         |

| <b>Observaciones</b>          | <b>Remarks</b>                |
|-------------------------------|-------------------------------|
| dd/mm/aaaa                    | dd/mm/yyyy                    |
| dd/mm/aaaa                    | dd/mm/yyyy                    |
| Años                          | years                         |
|                               |                               |
|                               |                               |
| Medición 1                    | Measurement 1                 |
| Medición 2                    | Measurement 2                 |
| Promedio mediciones           | Average measurement           |
| Medición 1                    | Measurement 1                 |
| Medición 2                    | Measurement 2                 |
| Promedio mediciones           | Average measurement           |
| dd/mm/aaaa                    | dd/mm/yyyy                    |
| dd/mm/aaaa                    | dd/mm/yyyy                    |
| Años                          | years                         |
|                               |                               |
|                               |                               |
| Medición 1                    | Measurement 1                 |
| Medición 2                    | Measurement 2                 |
| Promedio mediciones           | Average measurement           |
| Medición 1                    | Measurement 1                 |
| Medición 2                    | Measurement 2                 |
| Promedio mediciones           | Average measurements          |
| Promedio mediciones           | Average measurements          |
| Promedio mediciones           | Average measurements          |
| promedio mediciones           | average measurements          |
| promedio mediciones           | average measurements          |
| 0=Val/Val 1=Val/Met 2=Met/met | 0=Val/Val 1=Val/Met 2=Met/met |
