# Supplementary material for: Increased academic stress is associated with decreased plasma BDNF in Chilean college students
Source: PeerJ. 2023 Nov 3;11:e16357. doi: 10.7717/peerj.16357 (PMC10629390; doi:10.7717/peerj.16357)
Supplement: Supplemental Information 1 [file peerj-11-16357-s001.xlsx]

## Sheet: CODEBOOK
Variable	Descripción	Description	Observaciones	Remarks
.ID	ID participantes	Participant ID
-9	Valores perdidos	Missing values
.Sexo	Sexo: 0=F;1=M	Sex: 0=F;1=M
	Beck-II
BB.FeNac	Fecha nacimiento	Date of birth	dd/mm/aaaa	dd/mm/yyyy
BB.FeEv	Fecha Evaluación Beck-II basal	Date of baseline Beck-II assessment	dd/mm/aaaa	dd/mm/yyyy
BB.Edad	Edad evaluación Beck-II basal	Age baseline Beck-II assessment	años	years
BB.Car	Carrera evaluación Beck-II basal	Career Beck-II baseline assessment
BB.Sem	Semestre evaluación Beck-II basal	Semester baseline Beck-II assessment
BB.1	Item 1: Tristeza	Item 1: Sadness
BB.2	Item 2: Pesimismo	Item 2: Pessimism
BB.3	Item 3: Sentimientos de Fracaso	Item 3: Feelings of failure
BB.4	Item 4: Pérdida de placer	Item 4: Loss of pleasure
BB.5	Item 5: Sentimientos de culpa	Item 5: Feelings of guilt
BB.6	Item 6: Sentimientos de castigo	Item 6: Feelings of Punishment
BB.7	Item 7: Insafisfaccion con uno mismo	Item 7: Dissatisfaction with oneself
BB.8	Item 8: Autocrtícas	Item 8: Self-criticism
BB.9	Item 9: Pensamos o deseos de suicidio	Item 9: Suicidal thoughts or desires
BB.10	Item 10: Llanto	Item 10: Crying
BB.11	Item 11: Agitación	Item 11: Agitation
BB.12	Item 12: Pérdida de interés	Item 12: Loss of interest
BB.13	Item 13: Indecision	Item 13: Indecision
BB.14	Item 14: Inutilidad	Item 14: Uselessness
BB.15	Item 15: Pérdida de Energía	Item 15: Loss of Energy
BB.16	Item 16: Cambio Patrón Sueño	Item 16: Change of Sleep Pattern
BB.17	Item 17: Irritabilidad	Item 17: Irritability
BB.18	Item 18: Cambio en el apetito	Item 18: Change in appetite
BB.19	Item 19: Dificultad de Concentración	Item 19: Difficulty in Concentration
BB.20	Item 20:Cansancio o fatiga	Item 20: Tiredness or fatigue
BB.21	Item 21: Pérdida de inetrés por el sexo	Item 21: Loss of interest in sex
BB.PT	Puntaje total Beck-II basal	Total Beck-II baseline score
FB.FeNac	Fecha nacimiento	Date of birth	dd/mm/aaaa	dd/mm/yyyy
FB.FeEv	Fecha Evaluación Beck-II final	Date of final Beck-II assessment	dd/mm/aaaa	dd/mm/yyyy
FB.Edad	Edad evaluación Beck-II final	Age final Beck-II assessment	años	years
FB.Car	Carrera evaluación Beck-II final	Career final Beck-II assessment
FB.Sem	Semestre evaluación Beck-II final	Semester final Beck-II assessment
FB.1	Item 1: Tristeza	Item 1: Sadness
FB.2	Item 2: Pesimismo	Item 2: Pessimism
FB.3	Item 3: Sentimientos de Fracaso	Item 3: Feelings of failure
FB.4	Item 4: Pérdida de placer	Item 4: Loss of pleasure
FB.5	Item 5: Sentimientos de culpa	Item 5: Feelings of guilt
FB.6	Item 6: Sentimientos de castigo	Item 6: Feelings of Punishment
FB.97	Item 7: Insafisfaccion con uno mismo	Item 7: Dissatisfaction with oneself
FB.8	Item 8: Autocrtícas	Item 8: Self-criticism
FB.9	Item 9: Pensamos o deseos de suicidio	Item 9: Suicidal thoughts or desires
FB.10	Item 10: Llanto	Item 10: Crying
FB.11	Item 11: Agitación	Item 11: Agitation
FB.12	Item 12: Pérdida de interés	Item 12: Loss of interest
FB.13	Item 13: Indecision	Item 13: Indecision
FB.14	Item 14: Inutilidad	Item 14: Uselessness
FB.15	Item 15: Pérdida de Energía	Item 15: Loss of Energy
FB.16	Item 16: Cambio Patrón Sueño	Item 16: Change of Sleep Pattern
FB.17	Item 17: Irritabilidad	Item 17: Irritability
FB.18	Item 18: Cambio en el apetito	Item 18: Change in appetite
FB.19	Item 19: Dificultad de Concentración	Item 19: Difficulty Concentrating
FB.20	Item 20:Cansancio o fatiga	Item 20: Tiredness or fatigue
FB.21	Item 21: Pérdida de inetrés por el sexo	Item 21: Loss of Interest in Sex
FB.PT	Puntaje total Beck-II final	Beck-II final total score
	ISCO-II academic stress inventory
BS.FeNac	Fecha nacimiento	Date of birth	dd/mm/aaaa	dd/mm/yyyy
BS.FeEv	Fecha Evaluación SISCO-II basal	Date of birth Date of baseline SISCO-II assessment	dd/mm/aaaa	dd/mm/yyyy
BS.Edad	Edad evaluación SISCO-II basal	Age baseline SISCO-II assessment	años	years
BS.Car	Carrera evaluación SISCO-II basal	Career baseline SISCO-II assessment
BS.Sem	Semestre evaluación SISCO-II basal	Semester baseline SISCO-II assessment
BS.P1	1:Sí 0:No	1:Yes 0:No
BS.P2	Número	Number
BS.P3_1	Sobrecarga de tareas y trabajos académicos	Overload of homework and academic work
BS.P3_2	La personalidad y carácter de los profesores	The personality and character of teachers
BS.P3_3	Las evaluaciones de los profesores (exámenes, ensayos, trabajos de investigación, etc.)	Teachers' evaluations (exams, essays, research papers, etc.)
BS.P3_4	El tipo de trabajo que te piden los profesores (consulta de mapas, fichas de trabajo, ensayos, mapas conceptuales, etc.)	The type of work teachers ask you to do (map consultation, worksheets, essays, concept maps, etc.).
BS.P3_5	No entender los temas que se abordan en la clase	Failure to understand the topics covered in class.
BS.P3_6	Participación en clase (responder a preguntas, exposiciones, etc.)	Participation in class (answering questions, presentations, etc.)
BS.P3_7	Tiempo limitado para hacer el trabajo	Limited time to do the work
BS.P3_8	Los compañeros de grupo progresan más rápido en tareas y/o trabajos académicos	Group mates make faster progress on homework and/or academic work.
BS.P4_1	Trastornos del sueño (insomnio o pesadillas)	Sleep disturbances (insomnia or nightmares)
BS.P4_2	Fatiga crónica (cansancio permanente)	Chronic fatigue (permanent tiredness)
BS.P4_3	Dolores de cabeza o migrañas	Headaches or migraines
BS.P4_4	Problemas de digestión, dolor abdominal o diarrea	Digestion problems, abdominal pain or diarrhoea
BS.P4_5	Rascarse, morderse las uñas, frotarse, etc.	Scratching, nail biting, rubbing, etc.
BS.P4_6	Somnolencia o mayor necesidad de dormir.	Drowsiness or increased need for sleep.
BS.P4_7	Dolores musculares y/o contracturas	Muscle aches and/or contractures
BS.P4_8	Reacciones cutáneas (sarpullido, descamación, etc.)	Skin reactions (rash, peeling, etc.)
BS.P4_9	Inquietud (incapacidad de relajarse y estar tranquilo)	Restlessness (inability to relax and be calm)
BS.P4_10	Ansiedad, angustia o desesperación	Anxiety, distress or despair
BS.P4_11	Aumento o reducción del consumo de alimentos	Increased or decreased food intake
BS.P4_12	Sentimientos de depresión y tristeza (decaído)	Feelings of depression and sadness (downhearted)
BS.P4_13	Sentimiento de agresividad o aumento de irritabilidad	Feelings of aggression or increased irritability
BS.P4_14	Cambios bruscos de humor	Sudden mood swings
BS.P4_15	Conflictos o tendencia a polemizar o discutir	Conflict or tendency to argue or quarrel
BS.P4_16	Aislamiento de los demás	Isolation from others
BS.P4_17	Desgano para realizar tus labores de estudiante	Unwillingness to do your work as a student
BS.P5_1	Elaboración de un plan de ejecución de sus tareas	Making a plan for the execution of your tasks
BS.P5_2	Elogios a sí mismo	Self-praise
BS.P5_3	Ventilación y confidencias (verbalización de la situación que preocupa)	Venting and confiding (verbalising the situation of concern)
BS.P5_4	Intenté sacar algo positivo o beneficioso de la situación estresante	I tried to get something positive or beneficial out of the stressful situation.
BS.P5_5	Practicar un pasatiempo (actividad física, leer, ver series, redes sociales, etc.)	Taking up a hobby (physical activity, reading, watching series, social networking, etc.)
BS.P5_6	Acompañarse de un ser querido (familia, mascotas, amigos, etc.)	Accompanying a loved one (family, pets, friends, etc.).
BS.EstSIS	Total Estresores SISCO-II evaluación basal	Total Stressors SISCO-II baseline assessment
BS.RfsSIS	Total Reacciones físicas y psicológicas SISCO-II evaluación basal	Total Physical and Psychological Reactions SISCO-II baseline assessment
BS.RcsSIS	Total reacciones del comportamiento social SISCO-II evaluación basal	Total social behavioural reactions SISCO-II baseline assessment
BS.RxTSIS	Total Reacción Total SISCO-II evaluación basal	Total Total Reaction Total SISCO-II baseline assessment
BS.EASIS	Total medida de estrés académico SISCO-II evaluación basal	Total Academic Stress Measurement SISCO-II baseline assessment
BS.AfSIS	Total Afrontamiento SISCO-II (Factor 4) evaluación basal	Total Coping SISCO-II (Factor 4) baseline assessment
BS.TSIS.Af	Total SISCO-II + afrontamiento evaluación basal	Total SISCO-II + coping baseline assessment
FS.FeNac	Fecha nacimiento	Date of birth	dd/mm/aaaa	dd/mm/yyyy
FS.FeEv	Fecha Evaluación SISCO-II final	Date of birth Date of final SISCO-II assessment	dd/mm/aaaa	dd/mm/yyyy
FS.Edad	Edad evaluación SISCO-II final	Age final SISCO-II assessment	años	years
FS.Car	Carrera evaluación SISCO-II final	Career final SISCO-II assessment
FS.Sem	Semestre evaluación SISCO-II final	Semester Final SISCO-II assessment
FS.P1	1:Sí 0:No	1:Yes 0:No
FS.P2	Número	Number
FS.P3_1	Sobrecarga de tareas y trabajos académicos	Overload of homework and academic work
FS.P3_2	La personalidad y carácter de los profesores	The personality and character of teachers
FS.P3_3	Las evaluaciones de los profesores (exámenes, ensayos, trabajos de investigación, etc.)	Teachers' evaluations (exams, essays, research papers, etc.)
FS.P3_4	El tipo de trabajo que te piden los profesores (consulta de mapas, fichas de trabajo, ensayos, mapas conceptuales, etc.)	The type of work teachers ask you to do (map consultation, worksheets, essays, concept maps, etc.).
FS.P3_5	No entender los temas que se abordan en la clase	Failure to understand the topics covered in class.
FS.P3_6	Participación en clase (responder a preguntas, exposiciones, etc.)	Participation in class (answering questions, presentations, etc.)
FS.P3_7	Tiempo limitado para hacer el trabajo	Limited time to do the work
FS.P3_8	Los compañeros de grupo progresan más rápido en tareas y/o trabajos académicos	Group mates make faster progress on homework and/or academic work.
FS.P4_1	Trastornos del sueño (insomnio o pesadillas)	Sleep disturbances (insomnia or nightmares)
FS.P4_2	Fatiga crónica (cansancio permanente)	Chronic fatigue (permanent tiredness)
FS.P4_3	Dolores de cabeza o migrañas	Headaches or migraines
FS.P4_4	Problemas de digestión, dolor abdominal o diarrea	Digestion problems, abdominal pain or diarrhoea
FS.P4_5	Rascarse, morderse las uñas, frotarse, etc.	Scratching, nail biting, rubbing, etc.
FS.P4_6	Somnolencia o mayor necesidad de dormir.	Drowsiness or increased need for sleep.
FS.P4_7	Dolores musculares y/o contracturas	Muscle aches and/or contractures
FS.P4_8	Reacciones cutáneas (sarpullido, descamación, etc.)	Skin reactions (rash, peeling, etc.)
FS.P4_9	Inquietud (incapacidad de relajarse y estar tranquilo)	Restlessness (inability to relax and be calm)
FS.P4_10	Ansiedad, angustia o desesperación	Anxiety, distress or despair
FS.P4_11	Aumento o reducción del consumo de alimentos	Increased or decreased food intake
FS.P4_12	Sentimientos de depresión y tristeza (decaído)	Feelings of depression and sadness (downhearted)
FS.P4_13	Sentimiento de agresividad o aumento de irritabilidad	Feelings of aggression or increased irritability
FS.P4_14	Cambios bruscos de humor	Sudden mood swings
FS.P4_15	Conflictos o tendencia a polemizar o discutir	Conflict or tendency to argue or quarrel
FS.P4_16	Aislamiento de los demás	Isolation from others
FS.P4_17	Desgano para realizar tus labores de estudiante	Unwillingness to do your work as a student
FS.P5_1	Elaboración de un plan de ejecución de sus tareas	Making a plan for the execution of your tasks
FS.P5_2	Elogios a sí mismo	Self-praise
FS.P5_3	Ventilación y confidencias (verbalización de la situación que preocupa)	Venting and confiding (verbalising the situation of concern)
FS.P5_4	Intenté sacar algo positivo o beneficioso de la situación estresante	I tried to get something positive or beneficial out of the stressful situation.
FS.P5_5	Practicar un pasatiempo (actividad física, leer, ver series, redes sociales, etc.)	Taking up a hobby (physical activity, reading, watching series, social networking, etc.)
FS.P5_6	Acompañarse de un ser querido (familia, mascotas, amigos, etc.)	Accompanying a loved one (family, pets, friends, etc.).
FS.EstSIS	Total Estresores SISCO-II evaluación final	Total Stressors SISCO-II final assessment
FS.RfsSIS.2	Total Reacciones físicas y psicológicas SISCO-II evaluación final	Total physical and psychological reactions SISCO-II final assessment
FS.RcsSIS	Total reacciones del comportamiento social SISCO-II evaluación final	Total social behavioural reactions SISCO-II final assessment
FS.RxTSIS	Total Reacción Total SISCO-II evaluación final	Total Total Reaction Total SISCO-II final assessment
FS.EASIS	Total medida de estrés académico SISCO-II evaluación final	Total Academic Stress Measurement SISCO-II final assessment
FS.AfSIS	Total Afrontamiento SISCO-II (Factor 4) evaluación basal	Total Coping SISCO-II (Factor 4) baseline assessment
FS.TSIS.Af	Total SISCO-II + afrontamiento evaluaciónfinal	Total SISCO-II + coping final assessment
	Basic data
BDG.FeNac	Fecha Nacimiento	Date of birth	dd/mm/aaaa	dd/mm/yyyy
BDG.FeEv	Fecha Evaluación datos generales basal	Date Assessment date general baseline data	dd/mm/aaaa	dd/mm/yyyy
BDG.Edad	Edad evaluación datos generales basal	Age assessment general baseline data	Años	years
BDG.Car	Carrera datos generales basal	Career general baseline data
BDG.Sem	Semestre datos generales basal	Semester general baseline data
BDG.TTOPsq	T. psiquiátrico datos generales basal	Psychiatric treatment general data baseline general data	1:Sí 0:No	1:Yes 0:No
BDG.TTOPsic	Tto psicológico datos generales basal	Psychological treatment general data baseline	1:Sí 0:No	1:Yes 0:No
BDG.TTOfar	Tto fármaco datos generales basal	Drug treatment general data baseline	1:Sí 0:No	1:Yes 0:No
BDG.TTOfarNom	Si: Cuál(es)	Yes: Which one(s)	Nombre	Name
BDG.Fuma	Fuma datos generales basal	Smoking general data baseline	1:Sí 0:No	1:Yes 0:No
BDG.FumaNro	Si: N°	If: No.	Número	Number
BDG.Bebe	Bebe datos generales basal	Drinks general data baseline	1:Sí 0:No	1:Yes 0:No
BDG.BebeNro	Si: N°	Yes: No	Número	Number
BDG.AcFis	Ac. Física datos generales basal	Physical activity general data baseline	1:Sí 0:No	1:Yes 0:No
BDG.AcFisNro	Si: N°	Yes: No	Número	Number
BDG.AcFisCual	Si:	Yes: No	Cuál	Which
FDG.FeNac	Fecha Nacimiento	Date of birth	dd/mm/aaaa	dd/mm/yyyy
FDG.FeEv	Fecha Evaluación datos generales final	Date of evaluation final general data	dd/mm/aaaa	dd/mm/yyyy
FDG.Edad	Edad evaluación datos generales final	Age assessment final general data	Años	years
FDG.Car	Carrera datos generales final	Career final general data
FDG.Sem	Semestre datos generales final	Semester final general data
FDG.TTOPsq	T. psiquiátrico datos generales final	Psychiatric treatment final general data	1:Sí 0:No	1:Yes 0:No
FDG.TTOPsic	Tto psicológico datos generales final	Psychological treatment final general data	1:Sí 0:No	1:Yes 0:No
FDG.TTOfar	Tto fármaco datos generales final	Drug treatment final general data	1:Sí 0:No	1:Yes 0:No
FDG.TTOfarNom	Si: Cuál(es)	Yes: Which one(s)	Nombre	Name
FDG.Fuma	Fuma datos generales final	Smoking final general data	1:Sí 0:No	1:Yes 0:No
FDG.FumaNro	Si: N°	If: No.	Número	Number
FDG.Bebe	Bebe datos generales final	Drinks final general data	1:Sí 0:No	1:Yes 0:No
FDG.BebeNro	Si: N°	If: No.	Número	Number
FDG.AcFis	Ac. Física datos generales final	Physical activity final general data	1:Sí 0:No	1:Yes 0:No
FDG.AcFisNro	Si: N°	Yes: No	Número	Number
FDG.AcFisCual	Si:	Yes: No	Cuál	Which
	AUDIT questionnaire for the detection of alcohol consumption
FETOH.FeNac	Fecha Nacimeinto	Date of Birth	dd/mm/aaaa	dd/mm/yyyy
FETOH.FeEv	Fecha Evaluación ETOH final	Date of Final ETOH Assessment	dd/mm/aaaa	dd/mm/yyyy
FETOH.Edad	Edad Evaluación ETOH final	Age Final ETOH assessment	Años	years
FETOH.Car	Carrera Evaluación ETOH final	Career Final ETOH assessment
FETOH.Sem	Semestre Evaluación ETOH final	Semester Final ETOH assessment
FETOH.A1	(1) ¿Con qué frecuencia consume alguna bebida alcohólica?:	(1) How often do you drink alcoholic beverages?	0. Nunca 1. 1 o menos al mes 2. De 2 a 4 veces al mes 3. De 2 a 3 veces a la semana 4. 4 o más veces a la semana	0. never 1. 1 or less per month 2. 2 to 4 times a month 3. 2 to 3 times a week 4. 4 or more times a week.
FETOH.A2	(2) ¿Cuántos TRAGOS de alcohol suele tomar en un día de consumo normal?:	(2) How many DRINKS of alcohol do you usually drink in a normal drinking day?	0. 1 ó 2 1. 3 ó 4 2. 5 ó 6 3. 7, 8 ó 9 4. 10 ó más	0. 1 or 2 1. 3 or 4 2. 5 or 6 3. 7, 8 or 9 4. 10 or more
FETOH.A3	(3) ¿Con que frecuencia toma 5 o más TRAGOS en un solo día?:	(3) How often do you have 5 or more DRINKS in a single day?	0. Nunca 1. Menos de una vez al mes 2. Mensualmente 3. Semanalmente 4. A diario o casi a diario	0. never 1.Less than once a month 2. monthly 3. weekly 4.Daily or almost daily
FETOH.A4	(4) En el curso del último año, ¿Con qué frecuencia ha sido incapaz de parar de beber una vez que había empezado?	(4) Over the course of the past year, how often have you been unable to stop drinking once you had started?	0. Nunca 1. Menos de una vez al mes 2. Mensualmente 3. Semanalmente 4. A diario o casi a diario	0. never 1.Less than once a month 2. monthly 3. weekly 4.Daily or almost daily
FETOH.A5	(5) En el curso del último año, ¿Con qué frecuencia no pudo hacer lo que se esperaba de usted porque había bebido?	(5) In the past year, how often were you unable to do what was expected of you because you had been drinking?	0. Nunca 1. Menos de una vez al mes 2. Mensualmente 3. Semanalmente 4. A diario o casi a diario	0. never 1.Less than once a month 2. monthly 3. weekly 4.Daily or almost daily
FETOH.A6	(6) En el curso del último año, ¿Con qué frecuencia ha necesitado beber en ayunas para recuperarse después de haber bebido mucho el día anterior?	(6) In the past year, how often have you needed to drink on an empty stomach to recover from heavy drinking the day before?	0. Nunca 1. Menos de una vez al mes 2. Mensualmente 3. Semanalmente 4. A diario o casi a diario	0. never 1.Less than once a month 2. monthly 3. weekly 4.Daily or almost daily
FETOH.A7	(7) En el curso del último año, ¿Con qué frecuencia ha tenido remordimientos o sentimientos de culpa después de haber bebido?	(7) In the past year, how often have you had regrets or feelings of guilt after drinking?	0. Nunca 1. Menos de una vez al mes 2. Mensualmente 3. Semanalmente 4. A diario o casi a diario	0. never 1.Less than once a month 2. monthly 3. weekly 4.Daily or almost daily
FETOH.A8	(8) En el curso del último año, ¿Con qué frecuencia no ha podido recordar lo que sucedió la noche anterior porque había estado bebiendo?	(8) In the past year, how often have you been unable to remember what happened the night before because you had been drinking?	0. Nunca 1. Menos de una vez al mes 2. Mensualmente 3. Semanalmente 4. A diario o casi a diario	0. never 1.Less than once a month 2. monthly 3. weekly 4.Daily or almost daily
FETOH.A9	(9) ¿Usted o alguna otra persona ha resultado herido porque usted había bebido?	(9) Have you or anyone else been hurt because you had been drinking?	0. No 1. Sí, pero no en el curso del último año 2. Sí, el último año	0. No 1. Yes, but not within the last year" "2. 2. Yes, within the last year" "0.
FETOH.A10	(10) ¿Algún familiar, amigo, médico o profesional de la salud ha mostrado preocupación por su consumo de bebidas alcohólicas o le han sugerido que deje de beber?	(10) Have any family members, friends, doctors or health professionals shown concern about your drinking or suggested that you stop drinking?	0. No 1. Sí, pero no en el curso del último año 2. Sí, el último año	0. No Yes, but not within the last year" "0. Yes, in the last year" "0.
FETOH.PT	Puntaje total ETOH	Total ETOH score
	SRQ Self Reporting Questionnaire
FSRQ.FeNac	Fecha Nacimiento	Date of Birth	dd/mm/aaaa	dd/mm/yyyy
FSRQ.FeEv	Fecha Evaluación SRQ final	Date of Final SRQ Assessment	dd/mm/aaaa	dd/mm/yyyy
FSRQ.Edad	Edad Evaluación SRQ final	Age Final SRQ assessment	Edad	years
FSRQ.Car	Carrera Evaluación SRQ final	Career Final SRQ assessment
FSRQ.Sem	Semestre Evaluación SRQ final	Semester Final SRQ assessment
FSRQ.1	1. ¿Tiene frecuentes dolores de cabeza?	1. Do you have frequent headaches?	1:Sí 0:No	1:Yes 0:No
FSRQ.2	2. ¿Tiene mal apetito?	2. Do you have a poor appetite?	1:Sí 0:No	1:Yes 0:No
FSRQ.3	3. ¿Duerme mal?	3. Do you sleep badly?	1:Sí 0:No	1:Yes 0:No
FSRQ.4	4. ¿Se asusta con facilidad?	4. Are you easily frightened?	1:Sí 0:No	1:Yes 0:No
FSRQ.5	5. ¿Sufre de temblor de manos?	5. Do you suffer from hand trembling?	1:Sí 0:No	1:Yes 0:No
FSRQ.6	6. ¿Se siente nervioso, tenso o aburrido?	6. Does he feel nervous, tense or bored?	1:Sí 0:No	1:Yes 0:No
FSRQ.7	7. ¿Sufre de mala digestión?	7. Do you suffer from poor digestion?	1:Sí 0:No	1:Yes 0:No
FSRQ.8	8. ¿Le cuesta pensar con claridad?	8. Do you find it difficult to think clearly?	1:Sí 0:No	1:Yes 0:No
FSRQ.9	9. ¿Se siente triste?	9. Do you feel sad?	1:Sí 0:No	1:Yes 0:No
FSRQ.10	10. ¿Llora con mucha frecuencia?	10. Do you cry very often?	1:Sí 0:No	1:Yes 0:No
FSRQ.11	11. ¿Tiene dificultad para disfrutar sus actividades diarias?	11. Do you have difficulty enjoying your daily activities?	1:Sí 0:No	1:Yes 0:No
FSRQ.12	12. ¿Tiene dificultad para tomar decisiones?	12. Do you have difficulty making decisions?	1:Sí 0:No	1:Yes 0:No
FSRQ.13	13. ¿Tiene dificultad para hacer su trabajo diario? (¿sufre usted con su trabajo?)	13. Do you have difficulty in doing your daily work (do you suffer with your work?)?	1:Sí 0:No	1:Yes 0:No
FSRQ.14	14. ¿Es incapaz de desempeñar un papel útil en si vida?	14. Are you unable to play a useful role in your life?	1:Sí 0:No	1:Yes 0:No
FSRQ.15	15. ¿Ha perdido interés en las cosas?	15. Have you lost interest in things?	1:Sí 0:No	1:Yes 0:No
FSRQ.16	16. ¿Siente que usted es una persona inútil?	16. Do you feel that you are a useless person?	1:Sí 0:No	1:Yes 0:No
FSRQ.17	17. ¿Ha tenido la idea de acabar con su vida?	17. Have you ever had the idea of ending your life?	1:Sí 0:No	1:Yes 0:No
FSRQ.18	18. ¿Se siente cansado todo el tiempo?	18. Do you feel tired all the time?	1:Sí 0:No	1:Yes 0:No
FSRQ.19	19. ¿Tiene sensaciones desagradables en su estómago?	19. Do you have unpleasant feelings in your stomach?	1:Sí 0:No	1:Yes 0:No
FSRQ.20	20. ¿Se cansa con facilidad?	20. Do you get tired easily?	1:Sí 0:No	1:Yes 0:No
FSRQ.PT	Puntaje total SRQ	Total SRQ score	Puntaje de corte:11	Cut-off score:11
	Laboratory evaluations
BLAB.FeNac	Fecha Nacimiento	Date of birth	dd/mm/aaaa	dd/mm/yyyy
BLAB.FeEv	Fecha Evaluación basal	Date Baseline Assessment	dd/mm/aaaa	dd/mm/yyyy
BLAB.Edad	Edad Evaluación basal	Age Baseline assessment	Años	years
BLAB.Car	Carrera Evaluación basal	Career Baseline assessment
BLAB.Sem	Semestre Evaluación basal	Semester Baseline assessment
BLAB.BDNF1	[BDNF] ng/ml basal	[BDNF] ng/ml baseline	Medición 1	Measurement 1
BLAB.BDNF2	[BDNF] ng/ml basal	[BDNF] ng/ml baseline	Medición 2	Measurement 2
BLAB.BDNF	[BDNF] ng/ml basal	[BDNF] ng/ml baseline	Promedio mediciones	Average measurement
BLAB.Met1	% Metilación basal	% Basal methylation	Medición 1	Measurement 1
BLAB.Met2	% Metilación basal	% Basal methylation	Medición 2	Measurement 2
BLAB.Met	% Metilación basal	% Basal methylation	Promedio mediciones	Average measurement
FLAB.FeNac	Fecha Nacimiento	Date of birth	dd/mm/aaaa	dd/mm/yyyy
FLAB.FeEv	Fecha Evaluación final	Date Final assessment	dd/mm/aaaa	dd/mm/yyyy
FLAB.Edad	Edad Evaluación final	Age Final assessment	Años	years
FLAB.Car	Carrera Evaluación final	Career Final assessment
FLAB.Sem	Semestre Evaluación final	Semester Final assessment
FLAB.BDNF1	[BDNF] ng/ml final	[BDNF] ng/ml final	Medición 1	Measurement 1
FLAB.BDNF2	[BDNF] ng/ml final	[BDNF] ng/ml final	Medición 2	Measurement 2
FLAB.BDNF	[BDNF] ng/ml final	[BDNF] ng/ml final	Promedio mediciones	Average measurement
FLAB.Met1	% Metilación final	Final % Methylation	Medición 1	Measurement 1
FLAB.Met2	% Metilación final	Final % Methylation	Medición 2	Measurement 2
FLAB.Met	% Metilación final	Final % Methylation	Promedio mediciones	Average measurements
BDNF.log.BF	log [BDNF] Basal/Final	log [BDNF] Baseline/Final	Promedio mediciones	Average measurements
MET.log.BF	log % Metilación Basal/Final	log % Methylation Basaline/Final	Promedio mediciones	Average measurements
BDNF.RatBF	Ratio [BDNF] Basal/Final	Ratio [BDNF] Baseline/Final	promedio mediciones	average measurements
MET.RatBF	Ratio % Metilación Basal/Final	Ratio % Methylation Basaline/Final	promedio mediciones	average measurements
SNP.BDNF	SNP BDNF	BDNF SNP	0=Val/Val 1=Val/Met 2=Met/met	0=Val/Val 1=Val/Met 2=Met/met

## Sheet: FULL DATA
.ID	.Sexo	BB.FeNac	BB.FeEv	BB.Edad	BB.Car	BB.Sem	BB.1	BB.2	BB.3	BB.4	BB.5	BB.6	BB.7	BB.8	BB.9	BB.10	BB.11	BB.12	BB.13	BB.14	BB.15	BB.16	BB.17	BB.18	BB.19	BB.20	BB.21	BB.PT	FB.FeNac	FB.FeEv	FB.Edad	FB.Car	FB.Sem	FB.1	FB.2	FB.3	FB.4	FB.5	FB.6	FB.7	FB.8	FB.9	FB.10	FB.11	FB.12	FB.13	FB.14	FB.15	FB.16
1	0	1996-06-08	2018-03-12	21.7577	2	7	0	0	0	0	0	0	1	1	0	1	0	1	1	0	1	2	1	0	1	1	0	11	1996-06-08	2018-12-17	22.5243	2	8	0	0	0	0	0	0	0	1	-9	0	0	0	1	0	1	0
2	1	1994-02-16	2018-03-12	24.0657	2	7	1	0	1	1	1	1	0	0	0	0	0	0	0	0	1	0	1	0	1	1	1	10	1994-02-16	2018-12-04	24.7967	2	8	1	2	2	2	2	1	2	2	1	0	1	1	1	2	2	1
3	1	1997-03-31	2018-03-12	20.9473	2	7	0	0	0	0	0	0	0	0	0	0	0	0	0	0	0	0	0	0	0	1	0	1	1997-03-31	2018-12-17	21.7139	2	8	0	0	0	0	0	0	0	1	0	0	0	0	3	0	1	1
4	0	1996-04-15	2018-03-12	21.9055	2	7	0	0	0	0	0	0	0	1	0	0	0	1	0	0	0	2	0	1	0	0	0	5	1996-04-15	2019-01-11	22.7406	2	8	0	0	0	0	1	0	0	1	0	0	1	0	1	0	0	1
5	0	1996-12-02	2018-03-12	21.2731	2	7	0	1	0	1	1	0	0	1	0	0	1	0	0	1	0	1	0	0	0	0	0	7	1996-12-02	2018-12-20	22.0479	2	8	0	1	1	1	1	0	2	2	1	0	0	0	1	2	1	1
6	0	1994-12-17	2018-03-12	23.2334	2	7	0	0	0	0	0	0	0	0	0	0	0	0	0	0	0	1	0	0	0	0	0	1	1994-12-17	2018-12-04	23.9644	2	8	0	0	0	0	1	0	0	1	0	0	1	0	0	0	1	2
7	1	1997-03-03	2018-03-12	21.024	2	7	0	1	1	2	1	1	2	2	0	0	2	1	0	2	0	0	0	0	0	0	0	15	1997-03-03	2018-12-20	21.7988	2	8	0	0	0	0	0	0	1	0	0	0	0	0	0	0	0	0
8	0	1996-02-21	2018-03-12	22.0534	2	7	0	0	0	1	0	0	0	0	0	0	0	0	0	0	0	1	0	1	2	0	0	5	1996-02-21	2019-01-11	22.8884	2	8	0	0	0	0	0	0	0	0	0	0	0	1	0	0	0	0
9	1	1990-01-26	2018-03-12	28.1232	2	7	0	0	1	0	1	0	0	1	0	0	0	0	0	0	0	0	0	1	0	0	0	4	1990-01-26	2018-12-04	28.8542	2	8	1	1	1	1	1	0	0	0	0	0	1	1	1	1	0	1
10	0	1997-05-23	2018-03-12	20.8022	2	7	0	0	0	0	1	0	1	2	0	0	0	1	0	0	1	2	1	1	0	1	1	12	1997-05-23	2018-12-17	21.5688	2	8	0	0	1	0	0	0	0	1	0	1	1	1	0	0	2	1
11	1	1996-10-04	2018-03-12	21.4346	2	7	1	1	0	1	0	0	0	1	0	1	2	1	1	0	1	1	1	0	1	1	0	14	1996-10-04	2018-12-04	22.1656	2	8	1	1	0	1	1	0	1	0	0	1	2	1	1	1	1	1
12	0	1995-07-06	2018-03-12	22.6831	2	7	0	1	1	1	1	1	1	1	0	1	1	1	1	1	1	1	0	1	1	1	1	18	1995-07-06	2018-12-04	23.4141	2	8	1	1	2	2	1	1	2	2	0	1	2	1	2	2	2	2
13	0	1996-01-12	2018-03-12	22.1629	5	7	0	0	0	0	0	0	0	0	0	0	0	1	0	0	0	2	0	0	0	0	1	4	1996-01-12	2018-12-20	22.9377	5	8	1	0	1	1	0	0	1	1	0	2	1	1	1	0	2	0
14	0	1993-11-25	2018-03-12	24.293	5	7	0	0	0	0	1	0	1	1	0	0	0	0	0	0	1	2	0	1	1	1	0	9	1993-11-25	2018-12-20	25.0678	5	8	0	0	0	1	0	1	1	0	0	1	1	1	1	0	2	2
15	0	1996-01-11	2018-03-12	22.1656	5	7	1	1	0	1	0	0	0	0	0	0	1	1	1	0	0	0	0	0	0	0	0	6	1996-01-11	2018-12-20	22.9405	5	8	0	1	0	1	1	0	1	1	0	2	1	0	0	0	2	1
16	0	1996-04-24	2018-03-12	21.8809	5	7	0	0	0	0	0	0	0	0	0	0	0	0	0	0	0	1	0	1	0	0	0	2	1996-04-24	2018-12-20	22.6557	5	8	3	3	2	2	2	1	1	1	0	3	1	1	2	1	2	2
18	1	1997-02-01	2018-03-12	21.1061	5	7	1	0	0	1	0	0	1	1	0	0	1	0	1	0	1	1	0	0	1	1	0	10	1997-02-01	2018-12-19	21.8782	5	8	3	2	1	1	0	0	2	1	1	1	3	2	1	0	3	2
21	1	1996-04-30	2018-03-12	21.8645	2	9	1	1	1	0	1	0	0	2	0	0	0	0	0	3	1	0	0	0	2	0	0	12	1996-04-30	2018-12-19	22.6366	2	10	1	2	1	1	3	0	1	0	0	0	0	0	1	2	1	1
23	0	1995-11-29	2018-03-12	22.2834	5	9	0	0	0	0	0	0	0	0	0	0	0	0	1	0	0	1	0	1	1	0	0	4	1995-11-29	2019-12-27	24.0767	5	10	0	0	0	0	0	0	1	1	0	0	1	0	1	0	1	0
25	0	1996-12-13	2018-03-12	21.243	3	7	0	0	0	0	0	0	0	1	0	0	0	0	0	0	1	1	0	1	2	1	0	7	1996-12-13	2018-12-17	22.0096	3	8	0	0	0	1	0	0	0	1	0	0	3	0	1	0	1	1
26	0	1997-04-11	2018-03-12	20.9172	2	7	0	0	0	1	0	0	0	1	1	1	1	1	0	0	1	1	1	2	0	1	1	13	1997-04-11	2018-12-17	21.6838	2	8	0	0	0	0	0	0	0	0	0	1	1	1	0	0	0	1
27	0	1993-09-01	2018-03-12	24.5257	2	7	0	0	0	0	0	0	0	0	0	0	0	0	0	0	0	0	0	0	0	0	0	0	1993-09-01	2018-12-19	25.2977	2	8	0	0	0	0	0	0	0	0	0	1	1	0	0	0	1	2
28	1	1996-11-05	2018-03-12	21.347	2	7	0	0	0	0	0	0	0	0	0	0	0	0	0	0	0	0	0	0	0	0	0	0	1996-11-05	2018-12-17	22.1136	2	8	0	0	0	0	0	0	0	0	0	0	1	0	0	0	1	2
29	0	1997-01-22	2018-03-12	21.1335	2	7	0	0	0	1	0	0	2	2	0	0	1	1	2	2	2	2	0	1	0	1	1	18	1997-01-22	2018-12-04	21.8645	2	8	-9	-9	-9	-9	-9	-9	-9	-9	-9	-9	-9	-9	-9	-9	-9	-9
30	0	1997-06-14	2018-03-12	20.742	4	7	0	0	0	0	0	0	0	0	0	0	0	0	0	0	0	1	0	1	0	0	0	2	1997-06-14	2018-12-19	21.514	4	8	0	1	1	2	3	0	3	1	0	0	1	1	2	0	0	1
31	1	1996-12-11	2018-03-12	21.2485	4	7	0	0	0	0	0	0	0	0	0	0	0	0	1	0	0	1	0	1	0	0	0	3	1996-12-11	2018-12-19	22.0205	4	8	2	0	1	2	3	0	1	1	0	1	1	1	2	0	2	2
32	1	1997-08-27	2018-03-13	20.5421	2	5	0	0	0	0	0	0	0	0	0	0	0	1	1	0	0	1	0	0	0	0	0	3	1997-08-27	2018-12-04	21.2704	2	6	0	0	0	0	0	0	0	1	0	0	1	1	0	0	0	1
33	0	1997-01-11	2018-03-13	21.1663	2	5	0	0	0	0	0	0	0	0	0	0	0	1	0	0	0	1	0	1	0	0	0	3	1997-01-11	2018-12-04	21.8946	2	6	0	0	0	1	0	0	0	1	0	0	1	1	0	0	1	1
34	1	1996-08-08	2018-03-13	21.5934	2	5	0	1	0	1	1	0	1	1	0	0	1	1	2	0	1	3	0	2	1	1	0	17	1996-08-08	2018-12-04	22.3217	2	6	1	1	1	2	1	1	2	1	1	0	1	1	2	2	1	1
35	0	1998-05-23	2018-03-13	19.8056	2	5	0	0	1	0	1	0	1	1	0	0	0	1	1	2	0	2	3	2	2	0	0	17	1998-05-23	2018-12-04	20.5339	2	6	0	0	1	0	3	0	0	1	1	0	2	0	1	2	2	2
36	0	1998-02-15	2018-03-13	20.0712	2	5	0	1	0	0	0	0	0	1	0	0	1	0	1	0	1	2	0	1	1	0	0	9	1998-02-15	2018-12-04	20.7995	2	6	0	1	1	0	1	0	1	1	0	1	1	0	0	1	2	1
37	0	1998-01-07	2018-03-13	20.178	2	5	0	2	0	0	0	0	0	0	0	0	0	0	0	0	0	0	0	0	0	0	0	2	1998-01-07	2018-12-04	20.9062	2	6	0	2	1	1	1	0	1	2	0	1	1	1	1	2	3	2
38	0	1997-07-16	2018-03-13	20.6571	2	5	0	0	0	0	0	0	0	0	0	1	0	0	0	0	0	1	0	0	0	0	0	2	1997-07-16	2018-12-20	21.4292	2	6	0	0	1	0	0	0	0	1	0	1	1	0	0	0	1	1
39	0	1997-12-06	2018-03-13	20.2656	2	5	1	1	0	1	0	0	0	0	0	0	0	1	1	0	1	0	1	0	0	0	1	8	1997-12-06	2018-12-04	20.9938	2	6	1	1	0	0	3	0	2	1	0	2	1	1	0	0	2	2
40	1	1997-11-12	2018-03-13	20.3313	2	5	2	1	1	0	1	0	0	1	0	0	-9	-9	-9	-9	-9	-9	-9	-9	-9	-9	-9	-9	1997-11-12	2018-12-04	21.0595	2	6	0	1	1	0	1	0	1	1	0	0	3	1	1	3	1	0
41	0	1997-10-08	2018-03-13	20.4271	2	5	1	2	2	2	3	2	3	3	1	0	0	0	1	3	0	1	2	0	0	1	2	29	1997-10-08	2018-12-04	21.1554	2	6	3	2	2	1	2	1	1	0	2	3	1	2	0	2	1	0
42	0	1997-05-21	2018-03-13	20.8104	2	5	1	2	1	2	1	0	1	1	0	0	0	1	0	2	0	2	0	2	2	0	0	18	1997-05-21	2018-12-04	21.5387	2	6	0	2	3	0	2	0	3	3	1	2	3	0	3	3	2	2
43	0	1996-09-27	2018-03-13	21.4565	2	7	2	2	2	2	1	0	3	2	0	0	0	3	1	2	2	1	0	0	2	1	0	26	1996-09-27	2018-12-17	22.2204	2	8	1	2	2	1	1	0	3	2	0	2	1	1	1	2	2	1
44	0	1997-08-20	2018-03-13	20.5613	2	5	2	1	3	1	2	1	3	2	3	2	0	1	3	2	2	3	1	2	1	2	0	37	1997-08-20	2018-12-04	21.2895	2	6	2	2	3	1	3	3	3	2	3	2	1	3	3	2	2	2
45	1	1997-10-29	2018-03-13	20.3696	2	5	0	0	0	0	0	0	0	0	0	0	0	0	0	0	0	0	0	0	0	0	0	0	1997-10-29	2018-12-04	21.0979	2	6	0	0	0	0	0	0	0	0	0	0	0	0	0	0	0	0
46	1	1997-05-15	2018-03-13	20.8268	2	7	0	1	1	0	0	0	0	1	0	1	0	1	3	0	0	0	0	0	0	0	0	8	1997-05-15	2018-12-17	21.5907	2	8	0	2	1	0	1	0	0	0	0	0	0	0	0	0	1	0
47	0	1997-04-22	2018-03-13	20.8898	2	5	1	0	1	0	1	0	0	0	0	0	0	0	0	0	2	1	0	1	0	1	0	8	1997-04-22	2018-12-04	21.6181	2	6	2	2	2	2	3	1	2	1	1	1	1	2	2	2	2	2
49	0	1997-03-06	2018-03-13	21.0185	4	7	0	0	0	1	0	0	0	1	0	0	0	1	3	0	0	3	1	3	2	0	0	15	1997-03-06	2019-01-04	21.8316	4	8	0	0	0	0	0	0	0	1	0	0	1	1	3	0	2	3
52	1	1996-07-08	2018-03-13	21.6783	4	7	0	0	0	0	0	0	0	0	0	0	0	1	0	0	0	1	0	1	0	0	0	3	1996-07-08	2018-12-17	22.4422	4	8	0	0	0	0	0	0	0	0	0	0	1	0	0	0	1	0
53	0	1997-01-20	2018-03-13	21.1417	4	7	2	1	1	2	1	0	0	1	1	3	2	2	1	2	2	1	1	0	1	3	2	29	1997-01-20	2018-12-17	21.9055	4	8	2	2	1	2	1	0	2	2	1	3	2	3	0	0	2	3
54	0	1996-10-14	2018-03-13	21.41	4	7	0	1	0	1	1	1	0	1	0	0	2	0	0	0	0	0	0	1	0	0	0	8	1996-10-14	2018-12-17	22.1739	4	8	2	1	1	1	1	1	0	1	0	1	1	1	1	2	2	2
57	1	1995-01-31	2018-03-14	23.1157	2	9	0	0	0	0	0	0	0	0	0	0	1	0	0	0	1	0	1	0	0	1	0	4	1995-01-31	2018-12-21	23.8877	2	10	0	0	0	0	0	0	0	1	0	0	1	0	0	0	0	1
58	0	1997-02-25	2018-03-14	21.0459	4	5	0	0	0	1	0	0	0	1	0	0	0	1	0	0	0	1	0	1	1	0	0	6	1997-02-25	2018-12-17	21.807	4	6	1	0	0	0	1	0	0	1	0	0	1	1	0	0	1	1
59	1	1999-01-11	2018-03-14	19.1704	1	3	2	0	0	0	1	0	0	0	1	1	0	1	0	0	1	1	2	0	1	1	0	12	1999-01-11	2019-01-04	19.9808	4	4	0	0	1	1	0	0	1	1	0	0	1	0	-9	1	1	2
60	1	1998-08-18	2018-03-14	19.5702	1	3	0	0	1	0	0	0	0	1	0	0	1	0	1	0	0	1	0	1	0	0	0	6	1998-08-18	2019-01-04	20.3806	1	4	2	2	1	1	0	0	1	3	0	0	1	1	1	0	1	1
61	1	1999-04-28	2018-03-14	18.8775	1	3	0	0	0	0	0	0	0	1	0	0	0	0	0	0	1	0	0	0	0	1	0	3	1999-04-28	2019-01-04	19.6879	3	4	0	0	0	0	0	0	0	0	0	0	1	1	0	0	1	1
76	1	1999-03-09	2018-03-19	19.0281	1	3	0	0	0	0	0	0	0	1	0	0	0	0	0	0	1	1	1	0	2	0	0	6	1999-03-09	2018-12-19	19.781	2	4	0	1	0	0	0	0	0	1	0	0	1	0	0	0	1	1
77	0	1999-01-11	2018-03-19	19.1841	1	3	0	0	0	0	1	0	0	1	0	0	1	0	1	0	1	0	0	1	0	1	0	7	1999-01-11	2018-12-19	19.937	1	4	0	0	0	1	0	0	0	1	0	1	1	1	1	0	2	1
78	0	1998-11-01	2018-03-19	19.3785	1	3	0	1	0	0	0	0	0	0	0	0	0	1	0	0	0	0	0	0	0	0	0	2	1998-11-01	2018-12-19	20.1314	4	4	1	0	1	1	1	0	1	1	0	3	1	1	0	0	1	2
79	1	1998-02-20	2018-03-19	20.0739	5	5	0	0	1	0	1	0	1	1	0	0	1	0	1	1	1	1	0	1	2	1	2	15	1998-02-20	2019-01-04	20.8706	5	6	0	1	1	1	1	1	1	1	0	0	2	1	1	1	2	2
80	0	1996-09-24	2018-03-19	21.4812	1	3	0	0	0	1	0	0	0	0	0	0	1	1	2	0	0	1	0	0	1	0	0	7	1996-09-24	2019-01-10	22.2943	1	4	0	0	0	1	1	0	0	1	0	0	1	1	0	0	0	1
81	0	1998-06-16	2018-03-19	19.7563	5	5	0	1	1	1	0	0	1	1	1	3	1	0	0	0	0	1	0	1	1	0	0	13	1998-06-16	2019-01-04	20.553	5	6	0	1	0	1	1	0	0	1	0	0	1	1	0	0	1	1
82	0	1999-02-12	2018-03-19	19.0965	1	3	0	2	0	1	1	0	1	1	0	0	0	1	3	0	1	1	0	1	1	1	0	15	1999-02-12	2019-01-04	19.8932	1	4	0	1	0	0	1	0	1	2	0	1	1	3	3	2	2	3
83	0	1998-08-18	2018-03-19	19.5838	1	3	1	2	0	2	1	1	3	2	0	2	3	1	1	2	2	2	0	0	2	0	0	27	1998-08-18	2019-09-10	21.0623	1	4	2	2	3	2	2	3	3	3	1	3	2	3	3	3	2	3
84	1	1990-10-09	2018-03-19	27.4415	1	3	1	0	0	2	1	0	1	2	1	0	1	1	0	0	1	2	1	2	2	1	0	19	1990-10-09	2019-01-10	28.2546	1	4	1	1	1	2	0	0	1	1	0	1	2	1	1	0	2	1
86	1	1998-04-02	2018-03-19	19.9617	1	3	0	0	1	0	1	1	0	1	0	0	1	1	2	1	2	1	1	1	1	1	0	16	1998-04-02	2019-01-04	20.7584	3	4	0	1	0	2	1	0	1	1	1	0	1	1	1	0	1	2
87	0	1998-10-05	2018-03-19	19.4524	1	3	1	0	0	0	0	0	0	0	0	1	0	1	1	0	0	1	1	1	1	0	0	8	1998-10-05	2018-12-19	20.2053	1	4	1	1	0	0	0	0	0	0	0	1	1	1	1	0	1	1
88	0	1997-12-30	2018-03-19	20.2163	1	3	0	0	0	0	1	0	0	1	0	0	1	0	1	0	0	1	0	1	0	1	2	9	1997-12-30	2018-12-17	20.9637	5	4	0	1	0	1	0	0	0	1	0	0	1	1	0	0	1	3
89	1	1999-05-15	2018-03-19	18.8446	1	3	1	1	0	1	2	0	0	0	0	0	2	0	0	0	0	2	0	1	0	0	0	10	1999-05-15	2019-01-10	19.6578	1	4	2	1	1	1	1	2	3	1	1	0	2	1	2	2	1	1
91	0	1995-07-17	2018-03-19	22.6721	1	3	0	0	0	0	0	0	0	0	0	0	1	1	0	0	0	1	0	1	0	0	0	4	1995-07-17	2019-01-04	23.4689	1	4	0	0	1	1	0	0	0	0	0	0	1	0	1	0	0	1
[truncated: 165 more columns]
